# Supplementary material for: Effects of Acute Endurance Exercise on Plasma Protein Profiles of Endurance-Trained and Untrained Individuals over Time
Source: Mediators Inflamm. 2016 Apr 30;2016:4851935. doi: 10.1155/2016/4851935 (PMC4867072; doi:10.1155/2016/4851935)
Supplement: Supplementary file 1 — The Supplementary Material comprises in Table S1 the mean ± SD, median with the 1. and 3. quartile for all in the statistical analysis included variables, the AUCI scores for significant different variables are shown in Table S2, Table S3 contains all variables that showed no significant main effect and in Table S4 all performed correlations for the EET group with their corresponding VO2max can be found for plasma variables that differed significantly at baseline between groups. [file 4851935.f1.xlsx]

## Sheet: Supplemental table S1
parameter	unit	timepoint	EET (n=19)						SED (n=17)
			mean	± SD	1. quartile	median	3. quartile	mean	± SD	1. quartile	median	3. quartile
Adiponectin	ug/mL	pre	4.14211	1.26153	3.25	3.8	5.15	3.42941	1.38959	2.3	3.2	4.3
		post	4.40526	1.3066	3.65	4.1	5.3	3.55882	1.45691	2.4	2.8	4.7
		3h	4.24737	1.11722	3.45	4.1	5.15	3.7	1.67966	2.4	2.8	4.9
Alpha-1-Antitrypsin (AAT)	mg/mL	pre	1.71053	0.282636	1.5	1.7	1.9	1.5	0.183712	1.4	1.5	1.6
		post	1.82105	0.40631	1.5	1.6	2.2	1.5	0.278388	1.3	1.5	1.7
		3h	1.86316	0.360879	1.6	1.9	2	1.59412	0.167595	1.5	1.6	1.7
Alpha-2-Macroglobulin (A2Macro)	mg/mL	pre	1.89474	0.195714	1.8	1.9	2.05	1.73529	0.314128	1.6	1.7	1.8
		post	1.90526	0.250497	1.8	1.9	2	1.71765	0.359227	1.5	1.6	1.9
		3h	1.9	0.226078	1.75	1.9	2.05	1.8	0.425735	1.5	1.6	1.9
Alpha-Fetoprotein (AFP)	ng/mL	pre	0.667895	0.302004	0.415	0.66	0.85	0.815882	0.440852	0.41	0.73	1.1
		post	0.834211	0.382917	0.6	0.71	1.02	0.824706	0.376449	0.49	0.71	1.05
		3h	0.644737	0.375372	0.325	0.56	0.87	0.744706	0.415649	0.43	0.6	1.17
Apolipoprotein(a) (Lp(a))	ug/mL	pre	0.755263	0.252419	0.585	0.69	0.865	0.601176	0.245608	0.41	0.59	0.69
		post	0.777895	0.254942	0.635	0.71	0.88	0.588235	0.235511	0.38	0.55	0.74
		3h	0.766842	0.18388	0.66	0.75	0.865	0.602941	0.243073	0.39	0.53	0.77
Apolipoprotein A-I (Apo A-I)	mg/mL	pre	135.474	45.6172	110.5	126	150	160.941	48.2085	130	157	188
		post	124.737	38.0524	104	115	142	150.882	54.5159	121	141	178
		3h	129.895	35.6182	108	128	155	150.412	47.6682	122	164	182
Apolipoprotein C-III (Apo C-III)	ug/mL	pre	260.632	69.8659	240	268	292.5	255.824	58.9292	238	264	279
		post	278.684	84.5327	256	291	322	253.294	60.9598	220	250	287
		3h	271.158	71.7087	256.5	294	318	264.176	63.9289	232	265	296
Apolipoprotein H (Apo H)	ug/mL	pre	288.263	503.235	59.5	105	159	106.294	148.159	26	41	112
		post	303.895	535.062	62.5	116	223	103.412	139.878	27	43	110
		3h	268.474	443.062	60.5	105	260.5	112.059	148.742	28	48	127
Beta-2-Microglobulin (B2M)	ug/mL	pre	1.75789	0.315023	1.55	1.7	1.9	1.48235	0.235147	1.4	1.5	1.6
		post	2.42105	0.582694	2	2.4	2.65	1.67059	0.284527	1.5	1.7	1.8
		3h	1.94737	0.426052	1.65	1.8	2.15	1.62353	0.281801	1.5	1.6	1.7
Brain-Derived Neurotrophic Factor (BDNF)	ng/mL	pre	2.50526	2.8745	0.45	1.4	3.45	2.85294	3.54597	0.5	1	3.5
		post	4.11053	4.00484	0.85	2.6	6.6	4.31176	4.79985	1	2.6	5.9
		3h	2.42105	2.27268	0.5	1.7	4.2	3.39412	3.14314	1	2.9	4.1
C-Reactive Protein (CRP)	ug/mL	pre	9.75789	3.94677	7.1	9.8	12	8.16471	4.67292	5.3	7.6	11
		post	9.33158	4.60676	7.3	9.5	10.85	7.52353	4.15926	5.4	6.7	9
		3h	10.8895	6.51749	5.85	10.6	15.5	9.32941	5.31422	5.3	9.1	13.4
Calcitonin	pg/mL	pre	7.54737	3.34105	5.1	7.7	9.35	6.42941	3.11985	3.9	6.4	9
		post	11.5684	4.51455	8.15	12.3	14.4	8.11176	3.44073	5.1	8	9.5
		3h	7.81579	2.64707	6.15	7.6	9.55	6.15294	3.26403	4	5.6	6.8
Cancer Antigen 125 (CA-125)	U/mL	pre	2.23474	2.20807	0.92	1.7	2.8	2.5	1.77881	1.5	1.9	3.4
		post	2.54842	2.15186	1.51	1.99	2.835	2.61353	2.07827	1.7	1.97	2.69
		3h	2.56105	2.00222	1.565	2.31	2.845	2.30588	1.99134	1.16	1.96	2.43
Cancer Antigen 19-9 (CA-19-9)	U/mL	pre	75.9947	325.224	0.985	1.2	1.65	1.30529	0.58773	0.98	1.1	1.4
		post	1482.15	1103.48	1171.5	1373	1834	1074.79	940.122	1.04	1092	1674
		3h	1142.9	897.597	0.925	1314	1669.5	784.517	796.346	0.89	1154	1292
Carcinoembryonic Antigen (CEA)	ng/mL	pre	0.580526	0.127909	0.505	0.55	0.64	0.537647	0.188067	0.39	0.47	0.67
		post	0.713158	0.170784	0.59	0.69	0.8	0.608235	0.286885	0.42	0.46	0.71
		3h	0.648421	0.171149	0.515	0.56	0.82	0.545882	0.203257	0.4	0.44	0.71
CD 40 antigen (CD40)	ng/mL	pre	0.288421	0.25096	0.1	0.22	0.34	0.421176	0.550601	0.07	0.13	0.47
		post	0.347368	0.392157	0.115	0.26	0.335	0.521176	0.734506	0.08	0.16	0.44
		3h	0.286842	0.26673	0.09	0.2	0.395	0.46	0.493672	0.07	0.2	0.77
CD40 Ligand (CD40-L)	ng/mL	pre	1.15368	0.233481	0.975	1.11	1.3	1.18588	0.175644	1	1.1	1.3
		post	1.21684	0.239306	1.025	1.28	1.365	1.18824	0.263871	1	1.14	1.28
		3h	1.19474	0.255742	0.965	1.19	1.44	1.22471	0.184598	1.07	1.21	1.31
Complement C3 (C3)	mg/mL	pre	0.661421	1.20805	0.205	0.294	0.525	0.690353	0.9402	0.28	0.37	0.7
		post	155.257	674.599	0.213	0.26	0.5995	541.955	1141.36	0.209	0.486	0.861
		3h	305.175	917.038	0.1945	0.342	0.648	520.399	1106.83	0.285	0.618	0.785
Creatine Kinase-MB (CK-MB)	ng/mL	pre	2.10579	1.35316	1.15	1.8	2.6	0.976471	0.683328	0.53	0.8	1.2
		post	3.56158	2.87271	2.125	2.69	3.32	1.06294	0.986995	0.41	0.76	1.43
		3h	3.93947	2.63576	2.01	3.1	4.89	1.58941	1.03172	0.78	1.34	1.96
EN-RAGE	ng/mL	pre	0.321579	0.310435	0.17	0.2	0.35	0.221176	0.200215	0.07	0.19	0.24
		post	1.10053	0.587608	0.775	0.97	1.195	0.744118	0.360365	0.51	0.72	0.84
		3h	0.61	0.408452	0.35	0.48	0.82	0.542941	0.248892	0.34	0.56	0.71
Eotaxin-1	pg/mL	pre	54.8421	26.7192	34	53	73	59.5882	28.7643	43	56	78
		post	61.0526	24.688	49	55	71.5	70.7059	31.4479	49	74	91
		3h	48.2632	20.2013	33	50	63	58.4706	26.1034	46	58	71
Epidermal Growth Factor (EGF)	pg/mL	pre	84.5842	92.1847	11	37	165.5	107.329	136.522	6.8	25	215
		post	119.837	149.957	19.8	50	172.15	203.365	357.774	13.4	46.7	346.9
		3h	89.9526	108.873	10.2	28.2	130.7	121.706	140.737	20.8	36.5	273
Epithelial-Derived Neutrophil-Activating Protein 78 (ENA-78)	ng/mL	pre	0.977895	0.871133	0.205	0.8	1.6	1.46471	2.22326	0.22	0.47	1.8
		post	1.37947	1.00585	0.42	1.1	2.21	1.60647	1.99996	0.34	0.76	1.71
		3h	1.15789	1.04109	0.265	0.73	2.05	1.47824	1.81568	0.22	0.6	1.96
Factor VII	ng/mL	pre	432.526	103.954	354	438	523.5	505.471	132.637	389	533	591
		post	460.474	161.607	350.5	407	564.5	496.294	94.1181	447	502	533
		3h	452.684	127.538	342.5	449	557	495.941	103.084	413	534	553
Fatty Acid-Binding Protein, heart (FABP, heart)	ng/mL	pre	2.07895	1.04434	1.4	2.4	2.5	2.07059	1.09873	1.4	1.9	2.5
		post	6.48421	4.7874	3.3	4.5	7.35	3.18824	1.56919	2.3	3	3.7
		3h	8.03158	8.47762	3.6	4.7	7.9	12.4588	15.1489	2.8	5.1	11.5
Ferritin (FRTN)	ng/mL	pre	92.0526	53.5231	61.5	78	114	99.3529	54.9727	62	102	123
		post	98.4737	53.2899	61.5	89	137	102.118	56.1871	66	101	114
		3h	91.1579	45.1175	71	86	108.5	108.235	66.823	73	96	122
Fibrinogen	mg/mL	pre	4.30526	1.20714	3.6	4.2	4.8	3.7	0.474342	3.5	3.8	4
		post	4.18421	1.04523	3.55	4	4.65	4.18824	1.33271	3.6	3.9	4
		3h	4.44737	1.49865	3.55	4.2	4.8	3.94118	0.618525	3.6	3.9	4.2
Granulocyte Colony-Stimulating Factor (G-CSF)	pg/mL	pre	15.4989	6.86691	10.58	13.45	19.035	18.9882	10.4015	12.51	15.75	24.18
		post	22.5305	9.77602	17.065	21.85	25.44	21.8571	9.08352	14.31	20.02	27.91
		3h	21.1163	9.52671	14.115	20.09	28.115	20.2135	7.37618	14.25	19.4	24.27
Growth Hormone (GH)	ng/mL	pre	0.51	0.353916	0.265	0.48	0.745	0.297	0.369063	0.11	0.16	0.36
		post	33674.1	35345.8	6982	20862	48162.5	17587.2	16171	3657	13918	30474
		3h	271.333	547.949	0.4515	0.725	0.944	6.048	23.7658	0.127	0.337	0.47
Haptoglobin	mg/mL	pre	0.659474	0.581134	0.4	0.5	0.645	1.01765	0.597919	0.46	0.79	1.4
		post	0.644211	0.493337	0.355	0.53	0.815	0.914118	0.533585	0.47	0.91	1.24
		3h	0.637895	0.466947	0.35	0.6	0.78	0.943529	0.535828	0.47	0.94	1.06
Immunoglobulin A (IgA)	mg/mL	pre	3.36316	1.66073	2.05	3.1	4.5	3.16471	1.01239	2.5	3.1	3.4
		post	3.45789	1.61256	2.1	3.3	4.6	3.05294	0.945461	2.6	3	3.4
		3h	3.53684	1.7598	2.3	3.3	4.35	3.15882	0.966345	2.6	3	3.4
Immunoglobulin E (IgE)	U/mL	pre	66.8947	75.6798	32	53	59.5	319.706	422.825	38	149	503
		post	69.2105	73.881	26.5	53	74	308.471	386.108	30	144	450
		3h	67.6842	73.635	35	41	75	332.529	447.557	33	133	545
Immunoglobulin M (IgM)	mg/mL	pre	2.14737	0.785542	1.5	1.9	2.75	1.99412	0.811226	1.4	1.9	2.4
		post	2.26842	0.857031	1.6	2.2	3	1.92941	0.751469	1.4	2	2.3
		3h	2.17368	0.937397	1.4	1.7	2.9	2.10588	0.808912	1.6	2.2	2.6
Insulin	uIU/mL	pre	3.79632	1.76252	2.2	4	4.6	6.88235	4.67416	3.6	5.7	10
		post	1.92842	1.14353	1.01	1.92	2.845	3.61471	3.26816	1.81	2.26	3.82
		3h	2.93947	2.42986	1.27	2.25	4.225	4.20647	2.76672	2.07	4.12	5.56
Intercellular Adhesion Molecule 1 (ICAM-1)	ng/mL	pre	106.368	20.9476	90.5	104	120	103.824	25.9837	85	96	112
		post	116	26.8059	95	120	133.5	106.059	25.4226	89	107	119
		3h	112.895	26.583	89.5	123	129.5	105.235	23.6578	91	96	115
Interferon gamma (IFN-gamma)	pg/mL	pre	2.58421	2.36884	0.85	1.6	3.35	3.05294	2.47389	1.6	2.6	3.6
		post	3.48947	2.34613	1.65	2.6	4.65	2.94118	1.84799	1.6	2.7	3.8
		3h	3.05789	3.02661	1	2.2	3.7	2.78824	2.28004	1	1.7	4.4
Interleukin-1 beta (IL-1 beta)	pg/mL	pre	0.942105	0.811505	0.54	0.8	1.1	0.912353	0.556187	0.62	0.62	1.1
		post	3.70737	8.01396	1.03	1.61	2.635	1.40412	1.05971	0.88	1.18	1.71
		3h	1.59579	2.68211	0.54	0.66	1.135	1.42412	1.33585	0.68	1.08	1.59
Interleukin-1 receptor antagonist (IL-1ra)	pg/mL	pre	56.1579	33.9825	30	62	79	55.3529	25.5537	38	55	72
		post	67.1579	28.6362	54.5	71	81.5	68.8824	37.1212	42	65	86
		3h	79.5263	30.3779	68	71	97	61.7059	37.3527	38	56	79
Interleukin-3 (IL-3)	ng/mL	pre	0.0567895	0.0439097	0.028	0.05	0.061	0.0330588	0.050798	0.007	0.011	0.041
		post	0.0554737	0.0388535	0.0315	0.045	0.067	0.0288824	0.0436204	0.006	0.014	0.026
		3h	0.0580526	0.0283852	0.038	0.054	0.073	0.0348824	0.0488836	0.011	0.018	0.032
Interleukin-4 (IL-4)	pg/mL	pre	18.8947	7.96447	14.5	19	24	18.1176	9.43982	14	17	23
		post	21.9474	8.92857	16.5	24	28.5	20.4706	10.007	13	22	28
		3h	23.4737	8.87173	20	22	26	20.9412	9.35729	16	21	27
Interleukin-5 (IL-5)	pg/mL	pre	14.6368	8.97584	7.3	14	18.5	11.1588	14.9081	3.6	6.5	8.9
		post	15.0789	8.63247	8.75	11	20.75	10.1118	13.0308	3.4	5.2	9.5
		3h	16	7.45743	10.75	14.6	22.45	11.1882	15.2582	4.3	5.7	12.7
Interleukin-6 (IL-6)	pg/mL	pre	1.58947	1.11848	0.5	1.1	2.45	2.25882	1.85474	0.9	2.4	2.5
		post	6.34737	3.43533	4.1	5.7	7.35	4.12941	1.93254	3.3	3.9	5.2
		3h	2.67895	1.81585	1.2	2.6	3.55	2.99412	1.36541	2.2	3.1	4
Interleukin-7 (IL-7)	pg/mL	pre	74.3684	42.7515	44	77	87.5	52.3529	63.6062	10	35	46
		post	79.6842	47.3932	51	69	99.5	48.4706	52.9352	11	32	58
		3h	84.2632	39.4727	57	84	102.5	53.5294	56.9519	12	36	53
Interleukin-8 (IL-8)	pg/mL	pre	7.56316	3.19674	5.55	7.4	9.15	6.18235	3.3521	3.8	4.8	7.4
		post	11.3	4.31844	8.8	9.8	12.75	8.42941	3.86325	5.5	7.2	10.5
		3h	8.5	3.02747	5.85	8.5	9.45	5.98235	2.27135	4.5	6.3	7.1
Interleukin-10 (IL-10)	pg/mL	pre	4.57368	1.96323	3.25	4.1	5.1	4.05882	1.43224	2.6	3.9	5.5
		post	11.8	5.8678	6.8	10.8	14.8	6.28824	2.76855	4.4	5.6	8.9
		3h	6.52105	3.22242	3.9	6	7.8	4.22941	1.38869	2.9	4.6	5.1
Interleukin-12 Subunit p40 (IL-12p40)	ng/mL	pre	0.0925263	0.0425446	0.063	0.095	0.12	0.0831765	0.0507189	0.057	0.069	0.098
		post	0.098	0.0369564	0.089	0.097	0.121	0.0755294	0.0367799	0.031	0.081	0.096
		3h	0.105053	0.0445552	0.071	0.103	0.141	0.0952353	0.0546232	0.032	0.094	0.127
Interleukin-13 (IL-13)	pg/mL	pre	23.9579	11.291	16	23	29.7	17.3118	17.1576	9.3	12	17
		post	21.6105	10.251	12.55	22.9	29.15	16.2529	14.893	7.8	12.3	19.7
		3h	24.8895	10.8202	17.2	23.5	34	18.3294	17.3934	8.3	14	20.6
Interleukin-15 (IL-15)	pg/mL	pre	0.185789	0.159559	0.095	0.15	0.235	0.224118	0.186784	0.09	0.16	0.33
		post	0.205263	0.107928	0.145	0.2	0.285	0.252353	0.305154	0.04	0.15	0.24
		3h	0.187368	0.111696	0.145	0.16	0.235	0.224706	0.155448	0.13	0.17	0.34
Interleukin-16 (IL-16)	pg/mL	pre	235.158	48.5367	209	247	271	208.588	52.5346	153	204	259
		post	364.842	94.1637	287.5	352	430.5	298.176	63.7468	259	292	345
		3h	303.474	70.9619	249	308	346	279.412	60.838	231	289	312
Interleukin-18 (IL-18)	pg/mL	pre	243.158	77.0536	181	209	319.5	215.176	76.1448	173	198	223
		post	258.737	74.5072	199	249	312	222.471	66.1826	191	197	231
		3h	264.947	91.906	181.5	251	345.5	225.882	62.4549	180	221	273
Leptin	ng/mL	pre	1.04368	0.842267	0.44	0.76	1.4	4.68235	4.85557	1.8	2.3	6
		post	1.01421	0.789587	0.46	0.67	1.36	4.26529	3.38229	1.97	2.61	5.72
		3h	0.998947	0.822644	0.49	0.71	1.195	4.13647	3.23678	2.19	2.62	4.34
Macrophage-Derived Chemokine (MDC)	pg/mL	pre	146.684	45.2168	115	138	165	127.235	52.7394	89	122	145
		post	156.526	62.5232	112.5	154	182.5	137.647	57.2155	101	128	163
		3h	174.211	62.7265	134.5	168	187	138.941	48.8012	98	131	183
Macrophage Inflammatory Protein-1 alpha (MIP-1α)	pg/mL	pre	24.3158	11.3532	21.5	25	28.5	20.7647	14.2852	5	18	29
		post	25.5789	10.3243	21.5	26	31.5	20.1765	13.9698	5	19	26
		3h	25.4737	12.326	15.5	27	32.5	22.0588	12.9926	17	22	26
Macrophage Inflammatory Protein-1 beta (MIP-1 ß)	pg/mL	pre	342.526	75.5692	305	350	391.5	395.353	106.297	325	401	473
		post	363.789	75.6127	310.5	372	406.5	507.471	348.341	333	401	458
		3h	352.579	105.304	298	330	389.5	426	108.337	358	453	480
Matrix Metalloproteinase-2 (MMP-2)	ng/mL	pre	2305.74	390.845	2124.5	2260	2525	1988.65	512.401	1740	1940	2390
		post	2703.58	524.29	2399	2541	2862.5	2031.24	535.317	1810	2026	2462
		3h	2481.47	439.332	2226	2387	2618.5	2030.18	554.346	1787	2009	2383
Matrix Metalloproteinase-3 (MMP-3)	ng/mL	pre	13.7368	3.38037	11.5	13	15.5	12.5882	3.80885	10	12	15
		post	24.0526	6.91595	19.5	25	27.5	17.2353	5.17843	14	16	21
		3h	15.5263	4.42679	13	14	19.5	13.8235	5.4341	10	14	17
Matrix Metalloproteinase-9 (MMP-9)	ng/mL	pre	57.8947	31.1321	41	46	62.5	61.9412	32.727	39	51	78
		post	98.8421	34.7855	74	87	111	106.765	43.9738	64	109	135
		3h	121.895	70.9522	71.5	103	151	139.471	62.2486	88	154	186
Monocyte Chemotactic Protein 1 (MCP-1)	pg/mL	pre	182.158	52.6828	148	164	214	138.353	30.9171	112	148	161
		post	251.895	79.6945	190.5	223	298	196.176	67.4465	139	201	239
		3h	170.579	39.9727	146	169	187	160	68.8549	124	147	165
Myeloperoxidase (MPO)	ng/mL	pre	143.105	43.7199	122	139	162	168.941	126.644	122	142	157
		post	216.632	70.1793	175	223	248.5	226.118	111.816	182	207	245
		3h	161.474	63.3108	118	158	200.5	215.588	131.199	148	179	231
Myoglobin	ng/mL	pre	43.8421	14.5727	32	41	48.5	35.8824	10.3071	28	32	42
		post	78.1579	34.1618	56.5	64	91	58	24.1454	43	53	64
		3h	151.474	110.63	87.5	107	156	243.176	246.236	67	120	349
Plasminogen Activator Inhibitor 1 (PAI-1)	ng/mL	pre	39.1579	41.195	11	26	47.5	49.7647	38.2664	24	30	80
		post	58.2105	56.8747	17.5	30	65	54.3529	43.2954	29	39	68
		3h	38.9474	27.3363	20	34	53.5	49.0588	35.3738	24	32	80
Pregnancy-Associated Plasma Protein A (PAPP-A)	mIU/mL	pre	0.0202632	0.0107489	0.0125	0.017	0.0245	0.0144706	0.00661549	0.008	0.015	0.017
		post	0.0256842	0.0106565	0.018	0.024	0.032	0.0207647	0.00681478	0.016	0.021	0.024
		3h	0.0215263	0.0116159	0.0165	0.018	0.025	0.0175882	0.00579934	0.014	0.019	0.023
Prostate-Specific Antigen, Free (PSA-f)	ng/mL	pre	0.128474	0.0623782	0.0835	0.12	0.165	0.110353	0.0403917	0.087	0.1	0.13
		post	0.154421	0.058539	0.1315	0.154	0.195	0.118647	0.0517276	0.082	0.109	0.141
		3h	0.126	0.0569903	0.0915	0.111	0.1525	0.107706	0.0462922	0.069	0.1	0.134
Prostatic Acid Phosphatase (PAP)	ng/mL	pre	0.928421	0.218766	0.8	0.91	1.05	1.02235	0.333626	0.91	0.98	1.1
		post	1.05263	0.315715	0.855	0.98	1.215	0.901176	0.242639	0.76	0.91	1.11
		3h	0.756316	0.251246	0.57	0.72	0.92	0.771176	0.246827	0.66	0.75	0.89
Serum Amyloid P-Component (SAP)	ug/mL	pre	13.6842	2.49561	11.5	13	15	16.5294	3.18429	14	16	19
		post	13.8947	2.62244	12	13	15	16.2941	2.88887	15	17	18
		3h	13.6316	2.79306	12	14	15	17.1176	2.93433	15	17	19
Serum Glutamic Oxaloacetic Transaminase (SGOT)	ug/mL	pre	11.2105	2.14939	10	11	12.5	12.6471	3.56968	10	13	15
		post	11.6316	1.94966	10.5	11	13	12.4118	3.33652	10	12	13
		3h	13.4211	2.87355	11	14	16	13.1176	3.58613	11	13	15
Sex Hormone-Binding Globulin (SHBG)	nmol/L	pre	30.5263	8.01643	25	30	34.5	27	11.3963	20	25	37
		post	33.1053	9.80303	25.5	31	40	27.3529	12.8157	17	24	40
		3h	31.9474	9.10722	25.5	32	38.5	28.1176	12.6485	21	25	41
Stem Cell Factor (SCF)	pg/mL	pre	228.053	78.0473	173	226	248	254.176	188.916	145	206	266
		post	280.526	97.3021	217	270	364	262.412	171.845	169	208	285
		3h	259	93.9657	184	230	332	255.294	142.29	145	209	301
T-Cell-Specific Protein RANTES (RANTES)	ng/mL	pre	22.6684	28.3189	2.85	9.1	34	21.0824	26.3585	4.7	6.2	25
		post	35.9737	38.1793	4.85	23.1	48.95	28.7765	31.7513	7.9	11.3	53.4
		3h	24.5895	27.7166	3.55	12.5	40.65	24.4176	23.8716	6	15.4	40.3
Thrombopoietin (TPO)	ng/mL	pre	1.5	0.780313	0.95	1.5	1.8	1.31176	0.88944	0.6	1.2	1.7
		post	1.72105	1.02772	1	1.7	2.25	1.40588	0.859121	0.7	1.5	1.8
		3h	1.59474	0.600438	1	1.7	2.1	1.30588	0.746216	0.6	1.4	2
Thrombospondin-1	ng/mL	pre	770.211	802.266	171	474	1180	799.529	740.433	292	615	822
		post	1250.16	1045.87	496.5	829	1703	1292.06	974.517	552	836	1823
		3h	703.158	600.266	248.5	580	867.5	1043.71	736.905	608	747	1776
Thyroid-Stimulating Hormone (TSH)	uIU/mL	pre	1.90684	0.76	1.4	1.7	2.35	1.90353	1.00298	1.4	1.6	2.6
		post	2.42263	0.980764	1.62	2.26	3.12	1.87294	1.1499	1.27	1.61	2.12
		3h	1.59526	0.555781	1.165	1.62	1.94	1.39353	0.75223	0.93	1.06	2.01
Thyroxine-Binding Globulin (TBG)	ug/mL	pre	38.3158	9.29189	33	37	42	37.0588	5.69507	34	37	40
		post	40.3158	10.2905	33	39	46	37.5294	6.12492	33	38	40
		3h	40.2632	10.7953	32	40	44	39.8824	6.90002	36	39	45
Tissue Inhibitor of Metalloproteinases 1 (TIMP-1)	ng/mL	pre	71.8421	17.7115	60	67	78.5	65.2941	17.542	54	59	77
		post	87.6842	26.835	65	84	103	73.1765	26.185	54	63	86
		3h	74.5789	17.076	65.5	73	82.5	70.9412	18.5185	56	67	87
Tumor Necrosis Factor alpha (TNF-α)	pg/mL	pre	46.1053	41.2269	15	28	74	32.5294	42.4295	9	17	32
		post	55.2105	42.8986	20	38	92	30.4118	33.9983	11	14	36
		3h	47.6316	42.547	16.5	28	76.5	25.7059	25.1142	9	18	30
Tumor necrosis factor receptor 2 (TNFR2)	ng/mL	pre	5.24737	1.07412	4.5	5.1	6	4.41176	0.811544	3.9	4.4	4.9
		post	6.13158	1.17239	5.3	6.2	6.55	4.66471	0.851426	4.2	4.6	5.1
		3h	5.58947	1.31356	4.65	5.1	6.1	4.56471	0.763987	3.9	4.5	5.1
Vascular Cell Adhesion Molecule-1 (VCAM-1)	ng/mL	pre	618.895	135.89	518.5	612	691.5	521.412	114.104	424	463	622
		post	683.421	139.482	583.5	690	735.5	554.059	135.005	440	507	662
		3h	661.158	154.039	531	658	766.5	568.471	129.163	490	545	674
Vascular Endothelial Growth Factor (VEGF)	pg/mL	pre	487.526	121.394	418.5	460	531	455.647	104.923	375	422	519
		post	574.053	137.155	471	526	670	485.647	110.727	403	458	516
		3h	558.947	127.723	492	530	603.5	506.412	95.64	434	485	564
von Willebrand Factor (vWF)	ug/mL	pre	34.9474	46.5814	13.5	24	40.5	19.6471	8.54357	16	18	23
		post	65.5263	48.5722	27.5	60	85	84	139.338	27	42	53
		3h	86.0526	113.141	33.5	54	104	45.3529	28.8291	23	48	57

## Sheet: Supplemental table S2
parameter	AUCI EET (n=19)						AUCI SED (n=17)				p-value
	mean	± SD	1. quartile	median	3. quartile	mean	± SD	1. quartile	median	3. quartile	(EET vs. SED)
Interleukin-10 (IL-10)	767.211	633.402	309	585	990	210.882	321.84	-154.5	121.5	432.75	0.001
Matrix Metalloproteinase-3 (MMP-3)	1035.79	549.761	570	990	1470	492.353	340.909	157.5	315	637.5	0.001
Beta-2-Microglobulin (B2M)	71.0526	49.1635	36	63	99	25.4118	31.1249	8.25	27	50.25	0.002
Prostatic Acid Phosphatase (PAP)	0.852632	26.5093	-8.1	3	12.6	-25.9765	39.7395	-32.7	-15.6	-2.325	0.002
Matrix Metalloproteinase-2 (MMP-2)	46350	41049.6	17580	37620	82770	6324.71	34968.8	-21855	-9570	24502.5	0.004
Vascular Endothelial Growth Factor (VEGF)	12072.6	10468.7	8610	13050	17970	5745.88	7017.59	1822.5	4260	11962.5	0.011
Stem Cell Factor (SCF)	6579.47	7613.42	1800	6270	9900	808.235	7269.49	-1515	2235	6300	0.026
Creatine Kinase-MB (CK-MB)	241.042	299.38	36.3	117.3	321.9	44.5588	65.7682	9.225	62.4	119.625	0.03
Interleukin-7 (IL-7)	1072.11	4743.95	240	990	2700	-278.824	2290.9	-547.5	-15	667.5	0.034
Interleukin-5 (IL-5)	121.579	969.169	-195	240	537	-92.4706	352.722	-225	-60	159.75	0.046
CD 40 antigen (CD40)	16.0105	13.6899	7.2	11.7	27	6.84706	13.1206	-3.375	4.35	12.375	0.049

## Sheet: Supplemental table S3
parameter
Apolipoprotein a (LPa)
C Reactive Protein (CRP)
Calcitonin
CD40 Ligand (CD40-L)
Complement C3 (C3)
Factor VII
Ferritin (FRTN)
Fibrinogen
Haptoglobulin
Immunoglobulin A (IgA)
Immunoglobulin E (IgE)
Immunoglobulin M (IgM)
Interferon gamma (IFN-γ)
Interleukin-4 (IL-4)
Interleukin-12 Subunit p40 (IL-12p40)
Interleukin-15 (IL-15)
Macrophage Inflammatory Protein-1alpha (MIP-1α)
Serum Glutamic Oxaloacetic Transaminase (SGOT)
Thrombopoietin (TPO)

## Sheet: Supplemental table S4
parameter	Spearman's r
Alpha-1-Antitrypsin (AAT)	-0.02
Alpha-2-Macroglobulin (A2Macro)	0.05
Apolipoprotein A-I (Apo A-I)	0.66*
Apolipoprotein C-III (Apo C-III)	0.30
Beta-2-Microglobulin (B2M)	-0.16
Creatine Kinase-MB (CK-MB)	0.38
Growth Hormone (GH)	0.47
Interleukin-3 (IL-3)	0.34
Interleukin-5 (IL-5)	0.31
Interleukin-7 (IL-7)	0.22
Leptin	-0.68*
Macrophage-Derived Chemokine (MDC)	-0.12
Monocyte Chemotactic Protein 1 (MCP-1)	0.36
Serum Amyloid P-Component (SAP)	-0.52
Tumor necrosis factor receptor 2 (TNFR2)	-0.10
Vascular Cell Adhesion Molecule-1 (VCAM-1)	-0.09
